# Supplementary material
Source: MDPI journal article supplement (https://www.mdpi.com/2073-4395/8/9/187)
Supplement: s1 [file s1]

**Supplementary Materials:** The following are weather conditions during the test period.

**Table S1.** Weather conditions during the test period.

| <b>Date</b> | <b>Maximum<br/>temperature (°C)</b> | <b>Minimum<br/>temperature (°C)</b> | <b>Weather<br/>(day)</b> | <b>Weather<br/>(night)</b> | <b>Wind speed<br/>(m/s)</b> |
|-------------|-------------------------------------|-------------------------------------|--------------------------|----------------------------|-----------------------------|
| 2017/7/12   | 36                                  | 19                                  | Sunny                    | Sunny                      | 2.0                         |
| 2017/7/13   | 36                                  | 21                                  | Cloudy                   | Cloudy                     | 1.2                         |
| 2017/7/14   | 30                                  | 20                                  | Cloudy                   | Cloudy                     | 2.5                         |
| 2017/7/15   | 29                                  | 18                                  | Cloudy                   | Cloudy                     | 2.5                         |
| 2017/7/16   | 30                                  | 19                                  | Cloudy                   | Cloudy                     | 1.8                         |
| 2017/7/17   | 30                                  | 18                                  | Cloudy                   | Sunny                      | 1.5                         |
| 2017/7/18   | 32                                  | 18                                  | Cloudy                   | Cloudy                     | 2.5                         |
| 2017/7/19   | 33                                  | 19                                  | Sunny                    | Cloudy                     | 2.0                         |
